# Supplementary material for: Engineering atomic Fe–N–C with adjacent FeP nanoparticles in N,P-doped carbon for synergetic oxygen reduction and zinc–air battery
Source: Royal Society of Chemistry journal article supplement (doi:10.1039/d2nj04551f), 2022-10-28
Supplement: d2nj04551f1.pdf [file d2nj04551f1.pdf]

## Supporting Information

### **Engineering atomic Fe-N-C with adjacent FeP nanoparticles in N, P-doped carbon for synergetic oxygen reduction and Zinc-air battery**

Xiujuan Luan,<sup>†a</sup> Weiwei Bian,<sup>†a</sup> Di Guo,<sup>†a</sup> Bin Wang,<sup>a\*</sup> Wei Tan,<sup>b\*</sup> Fujun Peng,<sup>c\*</sup> Baolong Zhou<sup>a\*</sup>

*a. School of Pharmacy, Weifang Medical University, Weifang, 261053, Shandong, PR China.*

*b. Department of Respiration, The First Affiliated Hospital of Weifang Medical University (Weifang People's Hospital), Weifang 261000, Shandong, PR China*

*c. School of Bioscience and Technology, Weifang Medical University, Weifang, 261053, PR China*

*E-mail: zhoubaolong@wfmw.edu.cn*

<sup>†</sup>These authors contribute equal to this article.

## **Contents**

### **Section 1. Materials and Characterization**

### **Section 2. Experimental Details**

### **Section 3. <sup>1</sup>H NMR**

### **Section 4. FT-IR Spectra**

### **Section 5. TG**

### **Section 6. XPS of FeP-X catalysts**

### **Section 7. Electrochemical Performance**

### **Section 8. Supporting Tables**

### **Section 9. Supporting References**

## Section 1. Materials and Characterization

The morphologies of powder samples were evaluated by the scan electron microscopy (SEM, ZEISS GeminiSEM 500) and the transmission electron microscopy (TEM, FEI Talos F200x) via dipping the prepared samples on a Cu-net. X-ray Photoelectron Spectroscopy (XPS) was conducted on XPSESCALAB 250Xi analyser. Powder X-ray diffraction (XRD) parameters were obtained using a Rigaku Ultima IV diffractometer at a rate of  $5^{\circ} \text{ min}^{-1}$  from  $5^{\circ}$  to  $80^{\circ}$ . Thermal gravimetric analysis (TGA) were recorded using NETZSCH STA 449C analyzer from  $30^{\circ}\text{C}$  to  $1000^{\circ}\text{C}$  at a heating rate of  $10^{\circ}\text{C min}^{-1}$  under the protection of  $\text{N}_2$ . The Brunauer-Emmett-Teller (BET) method was utilized to calculate the specific surface area. The adsorption and desorption measurements for  $\text{N}_2$  were performed on ASAP2460 (Micromeritics) at low temperature of  $77 \text{ K}$ . Pore size distributions curves were obtained from the adsorption isotherms by the non-local density functional theory (NLDFT). Total pore volumes were calculated from the uptake at a relative pressure of 0.995. Before test, all porous polymer samples were degassed overnight under high vacuum at the temperature of  $150^{\circ}\text{C}$  to remove the solvent or the water absorbed in the porous skeleton. Raman spectra were collected from the 0 to  $4000 \text{ cm}^{-1}$  on a LabRAM HR Evolution (HORIBA) using a laser with an excitation wavelength of  $532 \text{ nm}$ .  $^1\text{H}$  spectra of prepared monomers were recorded on an Avance Bruker DPX 400 ( $400 \text{ MHz}$ ) in the solvent of DMSO. X-ray Photoelectron Spectroscopy (XPS) was conducted on XPSESCALAB 250Xi analyser.

## Section 2. Experimental Details

### Synthesis of 4-hydroxyphthalonitrile (HPN).

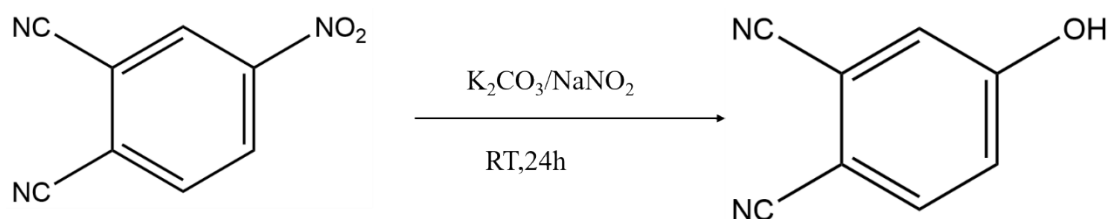

**Scheme 1.** Route for the synthesis of HPN

To a three-necked flask, 4-nitrophthalonitrile (3 g, 17.33 mmol), potassium carbonate (2.63 g, 19.06 mmol), Sodium nitrite (1.32 g, 19.06mmol) and 24 mL of DMSO were added. The mixture was continuously stirred at room temperature for 24 h. Then, the mixture was poured into 400 mL of dilute hydrochloric acid solution (0.1 mol/L). The precipitated gray solid was collected by suction filtration and washed with plenty of distilled water.  $^1\text{H-NMR}$  (400 MHz-DMSO- $d_6$ ): 7.21 (d 1H), 7.39 (s 1H), 7.91(d 1H).

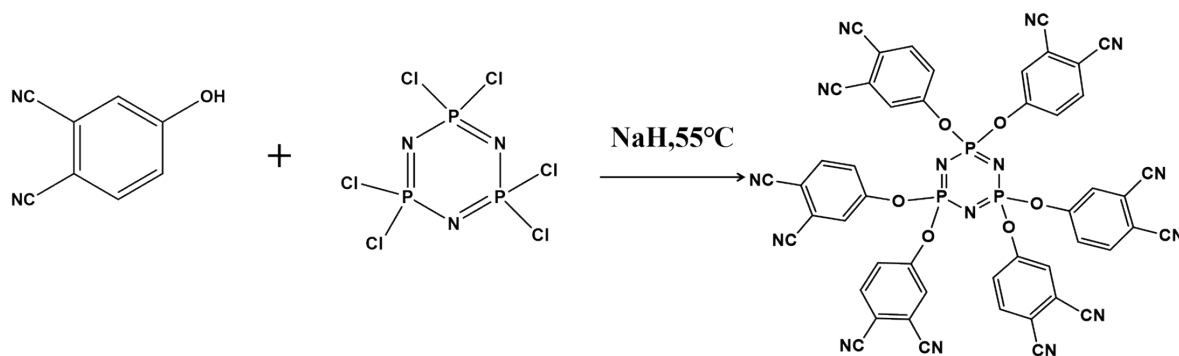

**Scheme 2.** Route for the synthesis of DPCP.

Phosphonitrilic chloride trimer (HCCP, 2 g, 5.75 mmol), NaH (0.83 g, 34.52 mmol), THF (86 mL), and HPN (4.97 g, 34.52 mmol) were added into a three-necked flask. The mixture was reacted at room temperature for 4 hours. Subsequently, the mixture was poured into distilled water, then which filtered and washed with water, isopropanol and propanone. The product was dried in a vacuum drying oven at 60 °C for 24 hours.  $^1\text{H-NMR}$  (400 MHz-DMSO- $d_6$ ): 7.66~7.69 (d · 1H), 7.98~7.99 (d 1H), 8.17~8.25(d 1H).

### The preparation of FeP-CMP

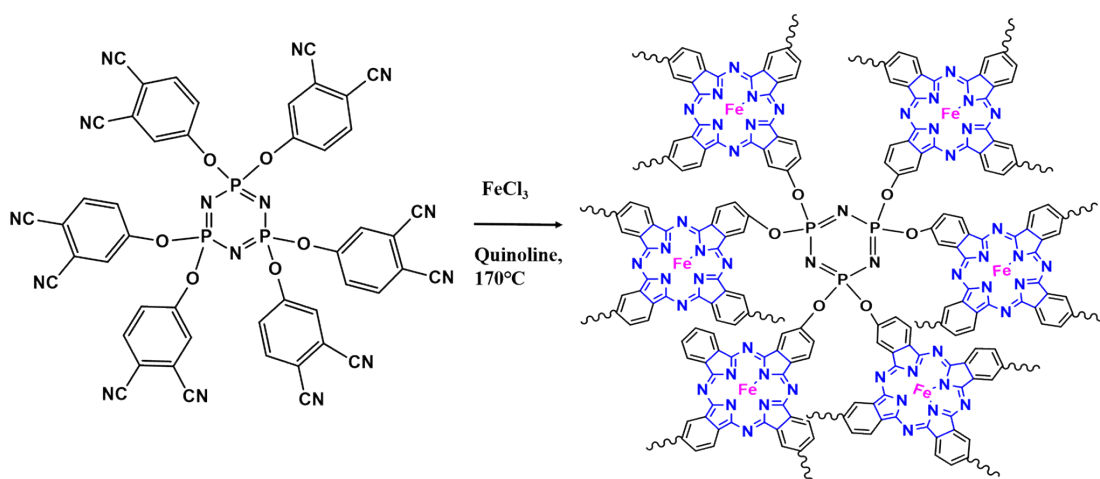

**Scheme 3.** Route for the synthesis of FeP-CMP.

Hexane-(3,4-dicyanophenoxy) cyclotriphosphazene ( 0.9934 g , 1.00 mmol ) and ferric chloride (0.344 g, 2.00 mmol) were stirred under Arand heated to 100 °C (15 min). Dry quinoline (7 mL) was added and the temper ature increased first to 120 °C (30 min) and then to 160°C. The reaction mixture was maintained at 160 °C for 18 h and then cooled and the precipitate filtered off. The product was washed with ethanol, dichloromethane, methanol, DMF and THF, and then extracted with THF for 24h. The product was dried in a vacuum drying oven at 100 °C to obtain the FeP-CMP powder.

### The preparation of FeP-X

The as-synthesized FeP-CMP was underwent direct pyrolysis under argon at target temperatures, yielding the final catalyst denoted as FeP-X (X is the pyrolysis temperature, X=800, 900 and 1000 °C, respectively).

### The preparation of FeP-900 (1:1)

Hexane-(3,4- dicyanophenoxy) cyclotriphosphazene ( 0.9934 g , 1.00 mmol ) and ferric chloride (0.172 g, 1.00 mmol) were stirred under Arand heated to 100 °C (15 min). Dry quinoline (7 mL) was added and the temper ature increased first to 120 °C (30 min) and then to 160°C. The reaction mixture was maintained at 160 °C for 18 h and then cooled and the precipitate filtered off. The product was washed with ethanol, dichloromethane, methanol, DMF and THF, and then extracted with THF for 24h. The product was dried in a vacuum drying oven at 100°C to obtain FeP-CMP (1:1) powder.

Subsequently, the as-synthesized FeP-CMP was underwent direct pyrolysis under argon at target temperatures, yielding the final catalyst denoted as FeP-900 (1:1).

### **The preparation of FeP-900 (1:3)**

Hexane-(3,4- dicyanophenoxy) cyclotriphosphazene ( 0.9934 g , 1.00 mmol ) and ferric chloride (0.4866 g, 3.00 mmol) were stirred under Arand heated to 100 °C (15 min). Dry quinoline (7 mL) was added and the temper ature increased first to 120 °C (30 min) and then to 160°C. The reaction mixture was maintained at 160 °C for 18 h and then cooled and the precipitate filtered off. The product was washed with ethanol, dichloromethane, methanol, DMF and THF, and then extracted with THF for 24h. The product was dried in a vacuum drying oven at 100°C to obtain FeP-CMP (1:3) powder. Subsequently, the as-synthesized FeP-CMP was underwent direct pyrolysis under argon at target temperatures, yielding the final catalyst denoted as FeP-900 (1:3).

### **Electrochemical Measurements<sup>1-6</sup>**

All electrochemical tests were performed using a conventional three-electrode system to measure the performance of ORR and OER at room temperature. Pt plate was used as the counter electrode, and KCl saturated Ag/AgCl or SCE (saturated calomel electrode) was used as the reference electrode. Considering the reversible hydrogen electrode (RHE) corresponded to the potentials of Ag/AgCl or SCE, the measured potentials was converted to the RHE by the Nernst equation ( $E_{\text{RHE}} = E_{\text{Ag/AgCl}} + 0.059 \cdot \text{pH} + 0.197 \text{ V}$ ,  $E_{\text{RHE}} = E_{\text{Hg/HgO}} + 0.059 \cdot \text{pH} + 0.098 \text{ V}$ )<sup>1</sup>.

The working electrode is a rotating disc electrode (RDE) consisting of a glass carbon disk (5.0 mm diameter) or a rotating ring disc electrode (RRDE) consisting of a glass carbon disk (3 mm diameter) surrounded by an outer Pt-ring (5 mm inner diameter and 7 mm outer diameter).The homogeneous catalyst ink was formed by ultrasonic oscillation of 75  $\mu\text{L}$  deionized water, 375  $\mu\text{L}$  ethanol, 25  $\mu\text{L}$  5wt% Nafion solution and suspension of 5 mg catalyst or 20wt% industrial Pt/C for about 0.5 h. The polished glass carbon substrate was used as the working electrode, coated with 8  $\mu\text{L}$  catalyst ink, and dried naturally for about 0.5 h to prepare a uniform catalytic layer.

The catalytic activity on ORR of the catalyst was investigated by cyclic voltammetry (CV) and rotating disk electrode (RDE) at CHI-760 electrochemical station. All tests were carried out under alkaline (0.1 M KOH), neutral (0.1 M PBS) or acidic (0.1M HClO<sub>4</sub>) conditions. Cyclic voltammetry (CV) was first carried out in Ar- and O<sub>2</sub>-saturated potassium hydroxide aqueous solutions (0.1 M) at 50 mV s<sup>-1</sup>. A linear sweep voltammetry (LSV) of 5 mV s<sup>-1</sup> was used to measure ORR polarization curves (400 to 2500 rpm) and OER polarization curves (1600 rpm) in O<sub>2</sub> saturated solution. The K-L equation was applied to investigate the ORR kinetic parameters.

The electrocatalytic kinetic performance was determined with the Koutecky-Levich (K-L) formula (S1)-(S2)<sup>2</sup>:

$$\frac{1}{J} = \frac{1}{J_L} + \frac{1}{J_K} = \frac{1}{B\omega^{1/2}} + \frac{1}{J_K} \quad (\text{S1})$$

In equation S1,  $J_L$  is the current that was measured;  $J_K$  represents the kinetic-limiting current and  $\omega$  is the rotation speeds of electrode.<sup>3</sup>

$$B = 0.62nFC_0(D_0)^{2/3} V^{1/6} \quad (\text{S2})$$

In equation S2,  $n$  is the total number of transferred electrons during the oxygen reduction process;  $F$  is Faradaic constant ( $F = 96485 \text{ C mol}^{-1}$ ),  $C_0$  is the O<sub>2</sub> concentration (solubility) in 0.1 M KOH electrolyte ( $1.2 \times 10^{-6} \text{ mol cm}^{-3}$ );  $D_0$  is the O<sub>2</sub> diffusion coefficient ( $1.90 \times 10^{-5} \text{ cm}^2 \text{ s}^{-1}$ ), and  $V$  is the kinematic viscosity of the O<sub>2</sub> saturated 0.1 M KOH solution ( $0.01 \text{ cm}^2 \text{ s}^{-1}$ ).

The H<sub>2</sub>O<sub>2</sub> yield and electron transfer number ( $N$ ) in ORR process were measured by a rotating ring disk electrode (RRDE). The scanning rate of the disc electrode is 5 mV s<sup>-1</sup>, and the calculation formula is as follows:<sup>4-6</sup>

$$\text{H}_2\text{O}_2\% = 200 \frac{\frac{Ir}{N}}{Id + \frac{Ir}{N}} \quad (\text{S3})$$

$$N = 4 \frac{I_d}{I_d + \frac{I_r}{N}} \quad (\text{S4})$$

In equation S3 and S4,  $I_d$  is the disk current, and  $I_r$  refers to the ring current and  $N$  represents the current collection efficiency of the Pt ring ( $N=0.4581$ ).

### **Zn-air batteries test**

To assemble the Zn-air battery, a Zn plate was used as the anode, carbon paper loaded with the catalyst was applied as the air cathode, and a mixture of 6 M KOH and 0.2 M  $\text{Zn}(\text{CH}_3\text{COO})_2$  was the electrolyte. The catalyst ink was prepared by dispersing 5 mg catalyst into 375  $\mu\text{L}$  ethanol and 125  $\mu\text{L}$  5wt% Nafion aqueous solution. The mixture was then dispersed by ultrasound for 0.5 h. The ink containing 1.5 mg catalyst was loaded onto 1  $\text{cm}^2$  carbon paper to make the zinc-air battery. A mixture of industrial Pt/C (20%), or the mixture of Pt/C (20%) and  $\text{IrO}_2$  with a mass ratio of 1:1 was also used as a reference air electrode. The discharge process curves were gotten via the electrochemical station (CHI760E) with a two-electrode system. Discharge-charge performance of the batteries were performed by a multichannel battery testing system (LAND CT2001A) at a current density of 10  $\text{mA cm}^{-2}$  with 5 min discharge and 5 min charge.

### **Section 3. $^1\text{H}$ NMR**

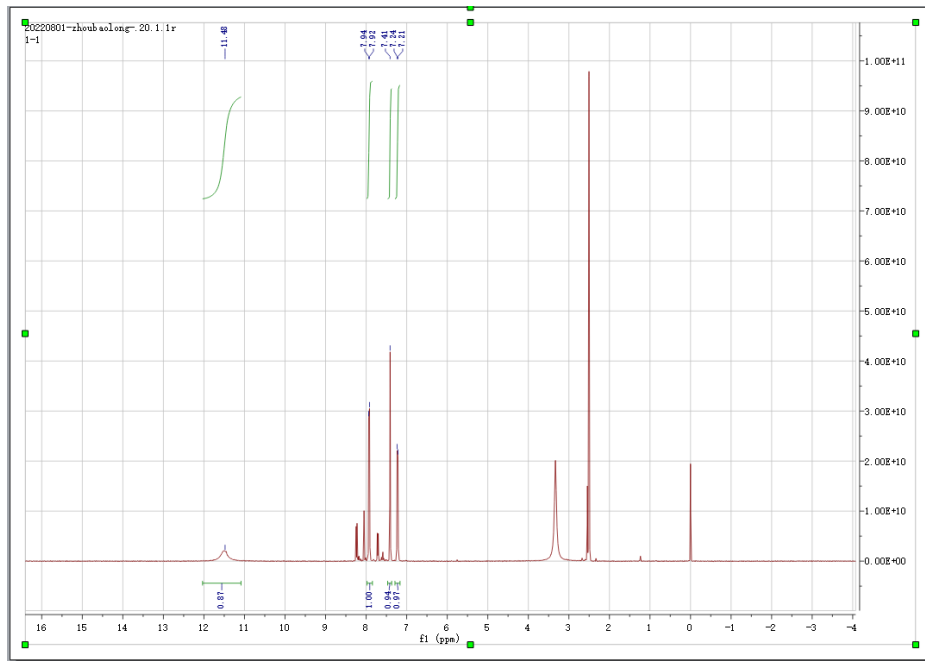

**Figure S1:**  $^1\text{H-NMR}$  spectrum of HPN

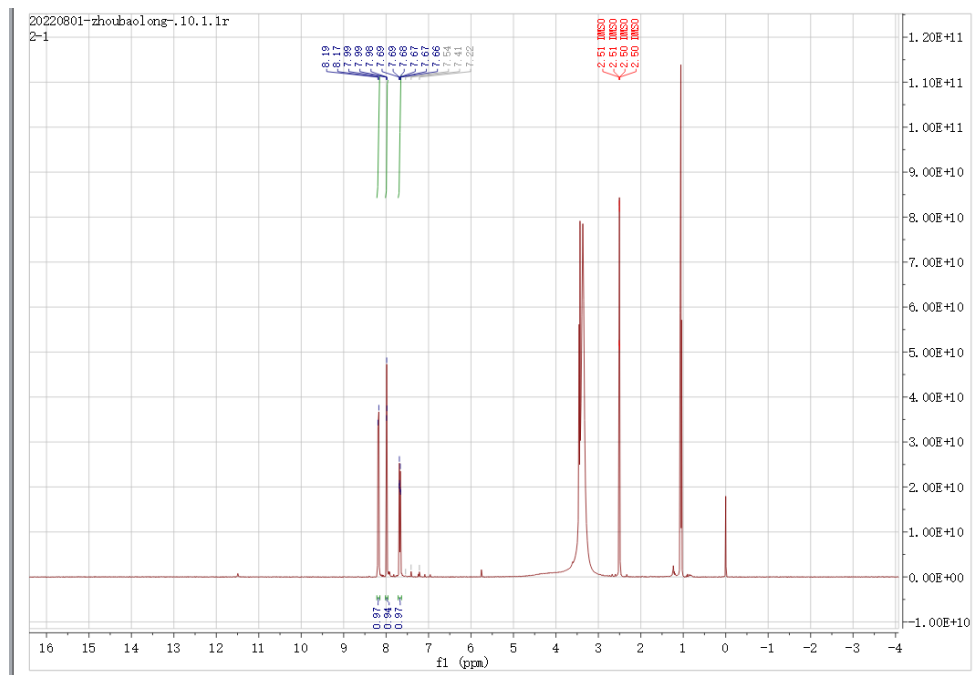

**Figure S2:**  $^1\text{H-NMR}$  spectrum of DPCP

## Section 4. FT-IR Spectra



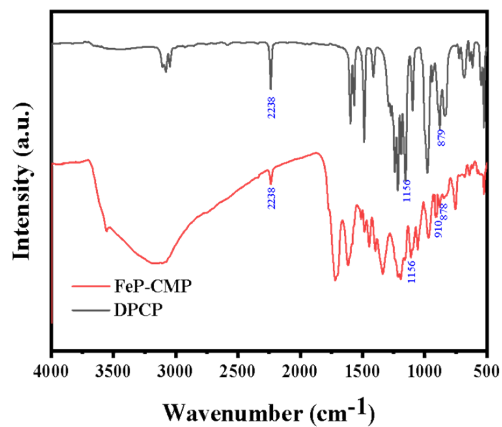

Figure S3. FTIR spectra of prepared precursors and corresponding FeP-CMP.

## Section 5. TG

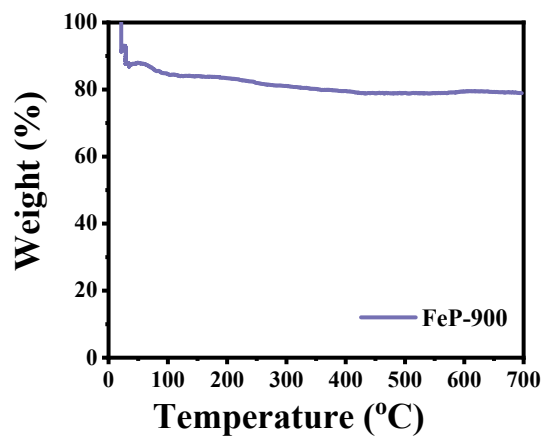

Figure S4. TGA of FeP-900 .

## Section 6. XPS of FeP-X catalysts

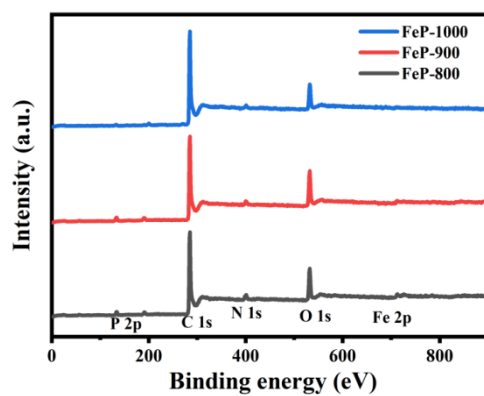

**Figure S5.** XPS survey of FeP-800, FeP-900 and FeP-1000 catalysts.

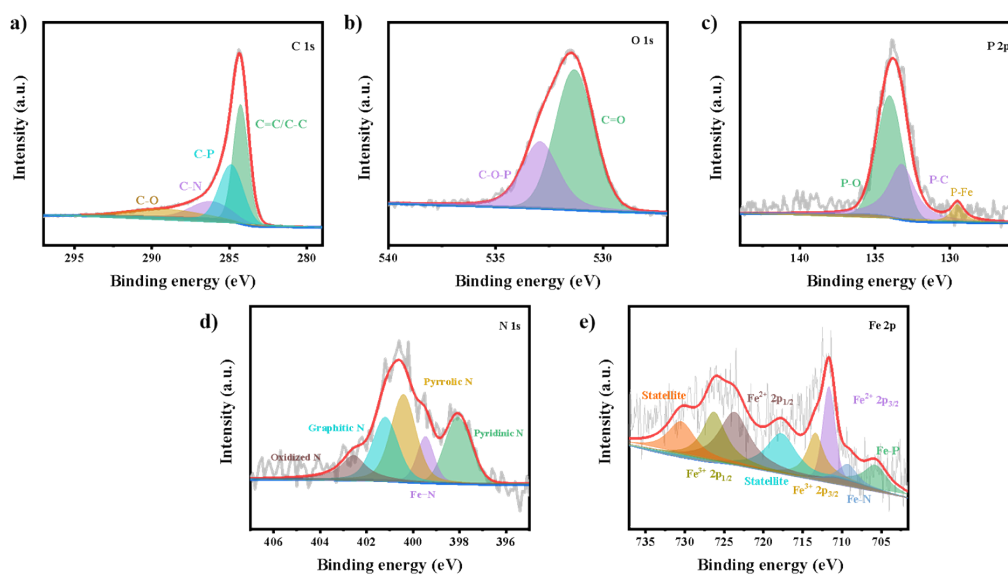

**Figure S6.** a) High-resolution XPS of C 1s spectra for FeP-800; b) High-resolution XPS of O 1s for FeP-800; c) High-resolution XPS spectra of P 2p spectra for FeP-800; d) High-resolution XPS spectra of N 1s spectra for FeP-800; e) High-resolution XPS spectra of Fe 2p spectra for FeP-800.

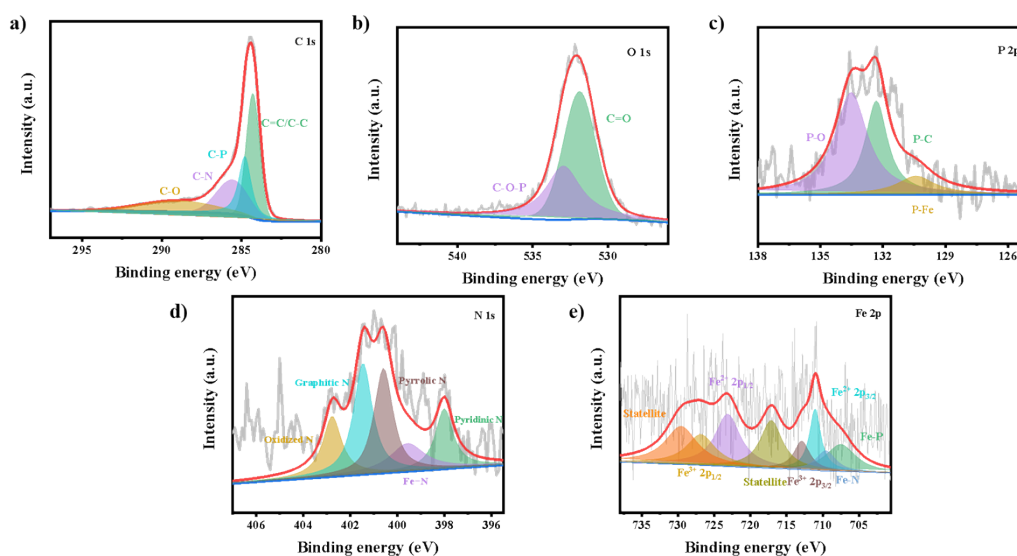

**Figure S7.** a) High-resolution XPS of C 1s spectra for FeP-1000; b) High-resolution XPS of O 1s for FeP-1000; c) High-resolution XPS spectra of P 2p spectra for FeP-1000; d) High-resolution XPS spectra of N 1s spectra for FeP-1000; e) High-resolution XPS spectra of Fe 2p spectra for FeP-1000.

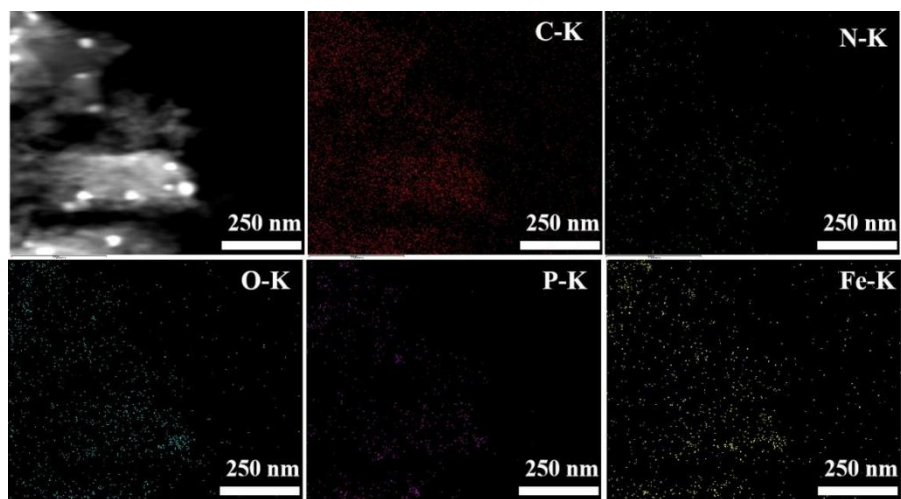

**Figure S8.** Element mappings of FeP-900 at a scale bar of 250 nm.

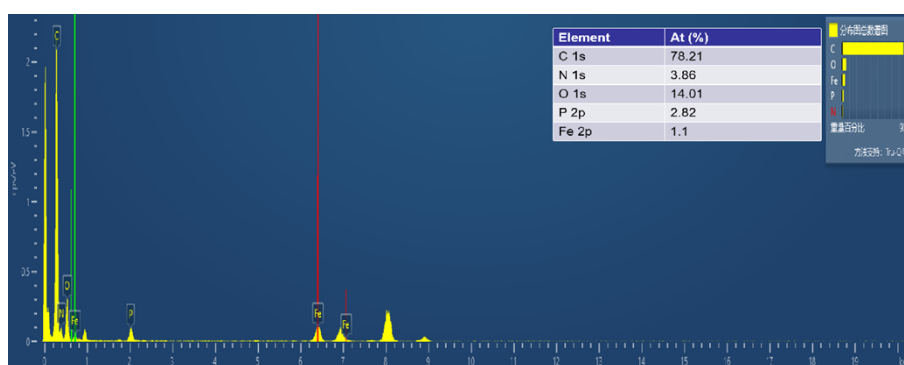

**Figure S9.** EDS spectra of FeP-900.

## Section 7. Electrochemical Performance

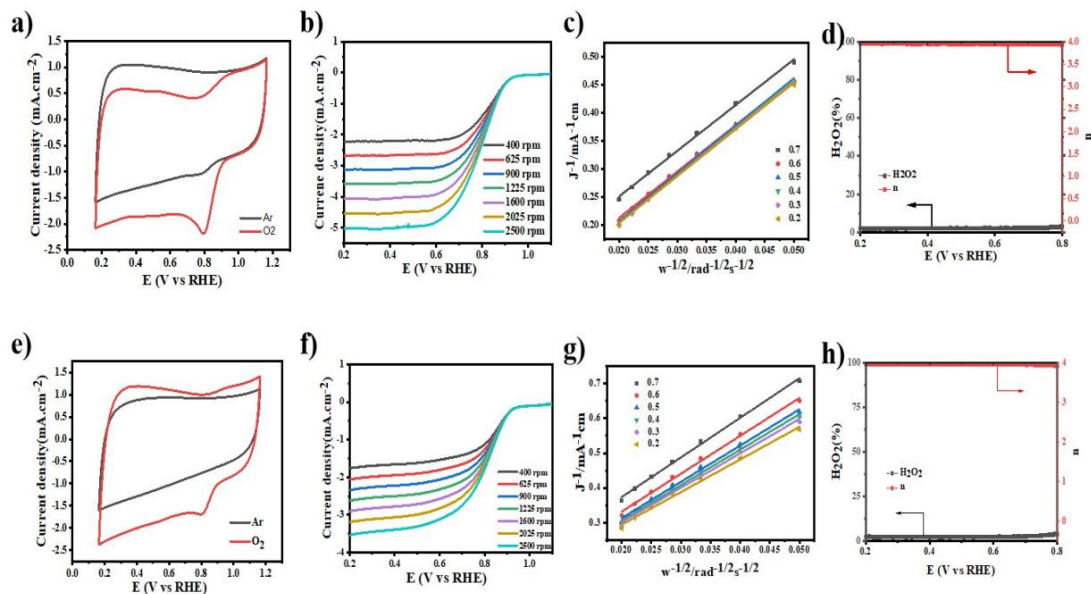

**Figure S10.** a) CV curves of FeP-900 (1:1) on a glassy carbon electrodes in 0.1 M KOH saturated with O<sub>2</sub> or Ar at a sweep rate of 50 mV s<sup>-1</sup>; b) LSV of FeP-900 (1:1) at various rotation speeds; c) K-L plots curves of FeP-900 (1:1); d) Percentage of hydrogen peroxide yield and the electron transfer number (n) of FeP-900 (1:1) ; e) CV curves of FeP-900 (1:3) on a glassy carbon electrodes in 0.1 M KOH saturated with O<sub>2</sub> or Ar at a sweep rate of 50 mV s<sup>-1</sup>; b) LSV of FeP-900 (1:3) at various rotation speeds; c) K-L plots curves of FeP-900 (1:3); d) Percentage of hydrogen peroxide yield and the electron transfer number (n) of FeP-900 (1:3).

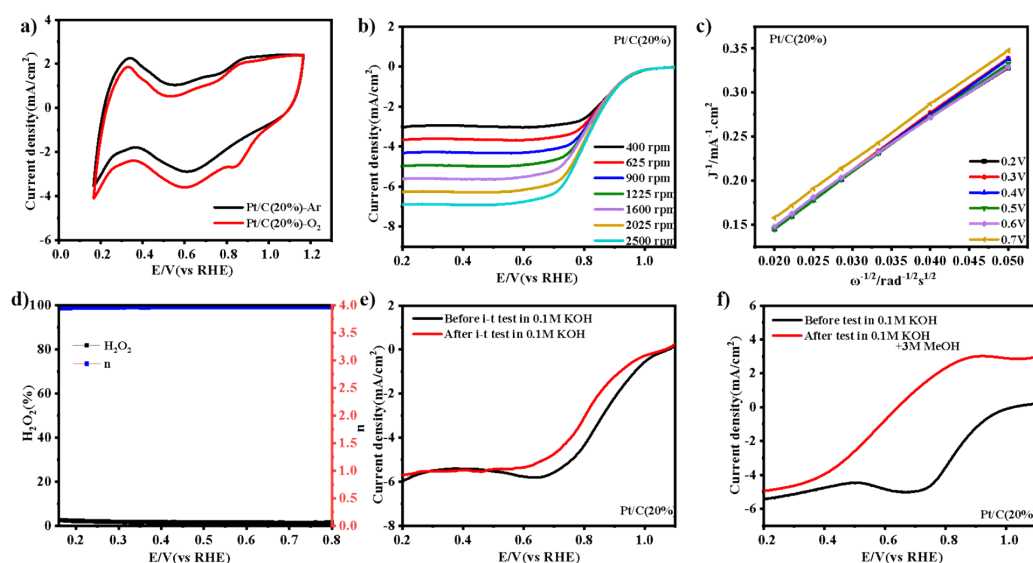

**Figure S11.** a) CV curves of commercial Pt/C (20%) on a glassy carbon electrodes in 0.1 M KOH saturated with O<sub>2</sub> or Ar at a sweep rate of 50 mV s<sup>-1</sup>; b) LSV of commercial Pt/C (20%) at various rotation speeds; c) K-L plots curves of commercial Pt/C (20%); d) Percentage of hydrogen peroxide yield and the electron transfer number (n) of Pt/C at different potentials; e) Polarization curves of Pt/C (20%) measured by RDE in O<sub>2</sub>-saturated 0.1 M KOH before (black line) and after (red line) the i-t (20000 s) experiments; f) LSV curve of Pt/C measured before and after the injection of 3 M methanol.

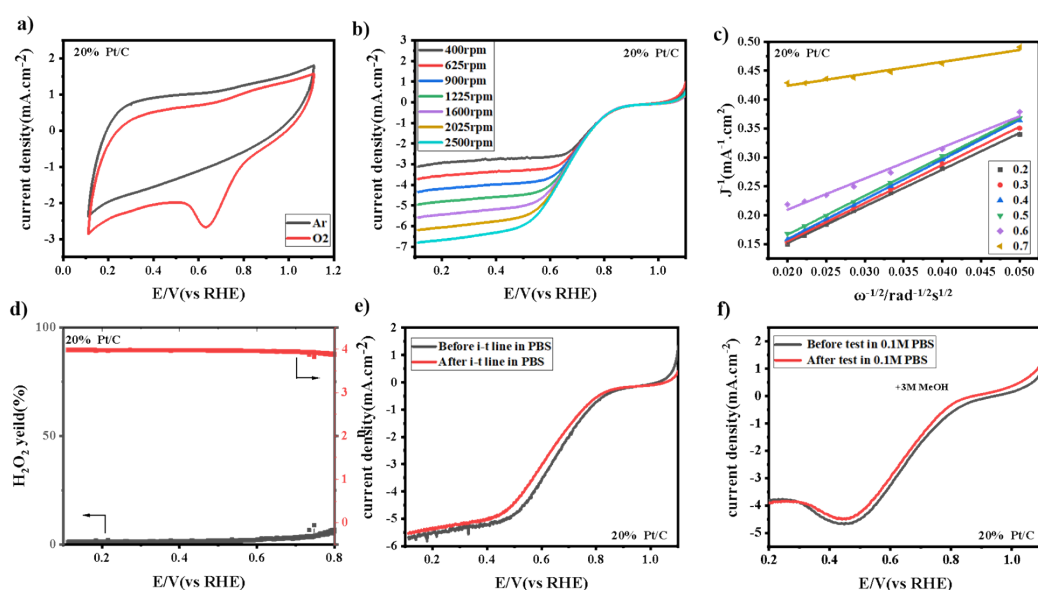

**Figure S12.** Electrochemical performance of commercial Pt/C in neutral conditions. a) CV curves of commercial Pt/C (20%) on glassy carbon electrodes in water solution of 0.1 M PBS saturated with O<sub>2</sub> or argon at a sweep rate of 50 mV s<sup>-1</sup>. b) LSV of commercial Pt/C (20%) at different rotation speeds; c) K-L plots curves of Pt/C (20%) at different potentials; d) Percentage of hydrogen peroxide yield and the electron transfer number (n) of Pt/C (20%) at different potentials; e) Polarization curves of Pt/C (20%) measured by RDE in O<sub>2</sub>-saturated 0.1 M PBS before (black line) and after (red line) the i-t (20000 s) experiments; f) LSV curve of Pt/C (20%) measured before and after the injection of 3 M methanol.

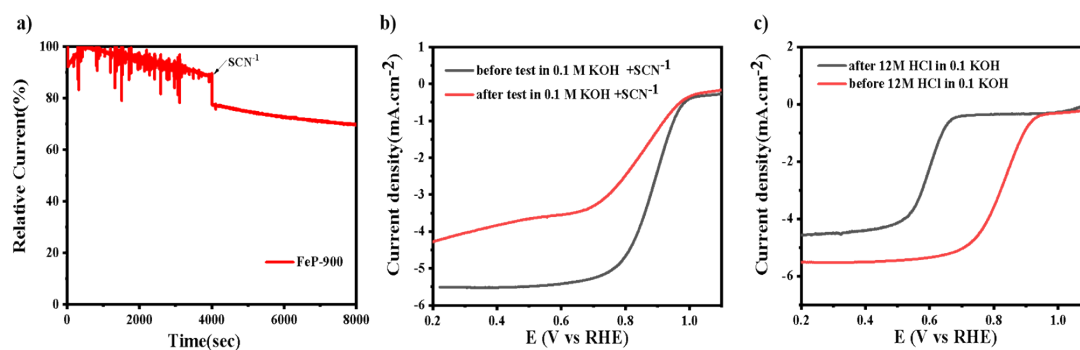

**Figure S13.** a) Current-time (i-t) curves; b) RDE results of FeP-900 in  $O_2$ -saturated 0.1 M KOH solution (without and with  $SCN^{-1}$ ); c) RDE result of FeP-900 in  $O_2$ -saturated 0.1 M KOH solution (before and after treatment with 12M HCl hydrochloric acid).

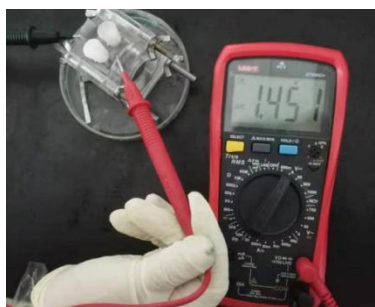

**Figure S14.** Open-circuit voltage (OCV) plots

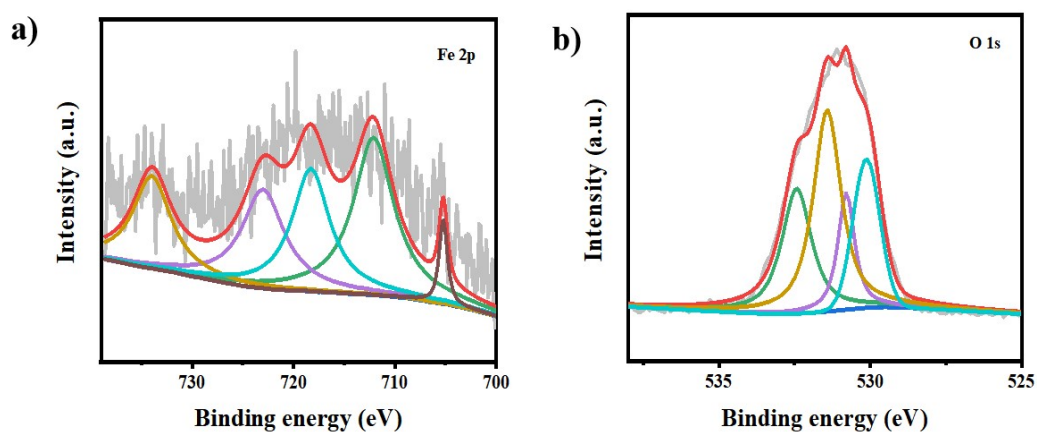

**Figure S15.** Fe 2p spectrum analysis of a zinc-air battery FeP-900 after long time charge and discharge operation

## Section 8. Supporting Tables

**Table S1.** Porosity Parameters of prepared corresponding catalysts

| Sample   | BET (m <sup>2</sup> /g) | V <sub>total</sub> (cm <sup>3</sup> /g) | V <sub>micro</sub> (cm <sup>3</sup> /g) | Mean Pore diameter(nm) |
|----------|-------------------------|-----------------------------------------|-----------------------------------------|------------------------|
| FeP-800  | 518.4                   | 0.2398                                  | 119.11                                  | 1.8502                 |
| FeP-900  | 959.16                  | 0.7216                                  | 220.37                                  | 3.0095                 |
| FeP-1000 | 551.94                  | 0.4465                                  | 126.81                                  | 3.2361                 |

**Table S2.** The surface element contents of different species including carbon, oxygen, nitrogen, cobalt and iron in as-synthesized catalysts, calculated from the XPS spectra

| Sample   | C (Atomic%) | N (Atomic%) | O (Atomic%) | P (Atomic%) | Fe (Atomic%) |
|----------|-------------|-------------|-------------|-------------|--------------|
| FeP-800  | 77.67       | 5.03        | 13.42       | 2.74        | 1.13         |
| FeP-900  | 78.21       | 3.86        | 14.01       | 2.82        | 1.1          |
| FeP-1000 | 84.87       | 3.02        | 10.48       | 1.04        | 0.6          |

**Table S3.** The surface contents of different N species in FeP-900 catalysts, calculated from the XPS spectra

| Sample   | Pyridinc N in total N (%) | Fe-N in total N (%) | Pyrrolic N in total N (%) | Graphitic N in total N (%) | Oxidized N in total N (%) |
|----------|---------------------------|---------------------|---------------------------|----------------------------|---------------------------|
| FeP-800  | 22.01                     | 11.28               | 31.69                     | 23.49                      | 11.53                     |
| FeP-900  | 17.31                     | 17.39               | 17.60                     | 29.58                      | 18.43                     |
| FeP-1000 | 18.04                     | 16.41               | 31.65                     | 34.29                      | 19.18                     |

**Table S4.** Summary of various electrocatalysts for ORR in 0.1 M KOH.

| Catalyst              | $E_{\text{Onset}}$ (V) | $E_{1/2}$ (V) | n           | Reference          |
|-----------------------|------------------------|---------------|-------------|--------------------|
| <b>FeP-900</b>        | <b>0.98</b>            | <b>0.82</b>   | <b>3.97</b> | <b>This work</b>   |
| Fe-NC                 | 0.96                   | 0.88          | 3.80        | ref. <sup>7</sup>  |
| Fe/N/S-CNTs           | 0.99                   | 0.89          | /           | ref. <sup>8</sup>  |
| Co/CoNx/N-CNT/C       | 0.90                   | 0.80          | 3.77        | ref. <sup>9</sup>  |
| CoFeNx/C              | 1.01                   | 0.87          | 3.5         | ref. <sup>10</sup> |
| Fe <sub>SA</sub> /NSC | 1.01                   | 0.91          | 3.99        | ref. <sup>11</sup> |
| (Fe, Co)@NGC          | 0.91                   | 0.85          | 3.70        | ref. <sup>12</sup> |
| Fe@C-NG/NCNTs         | 0.93                   | 0.84          | /           | ref. <sup>13</sup> |
| Fe/SNC                | 0.85                   | 0.77          | 3.85        | ref. <sup>14</sup> |

**Table S5.** Summary of various electrocatalysts for ORR in 0.1 M PBS

| Catalyst       | Onset potential<br>(V vs. RHE) | ORR<br>Half-wave<br>potential<br>(V vs. RHE) | n           | Ref.               |
|----------------|--------------------------------|----------------------------------------------|-------------|--------------------|
| <b>FeP-900</b> | <b>0.846</b>                   | <b>0.70</b>                                  | <b>3.96</b> | <b>This work</b>   |
| Fe-P-C         | 0.84                           | 0.52                                         | 3.80        | ref. <sup>15</sup> |



|                   |       |      |      |                    |
|-------------------|-------|------|------|--------------------|
| <b>HFCP-850</b>   | 0.83  | 0.60 | 3.94 | ref. <sup>16</sup> |
| <b>CP-CMP-900</b> | 0.906 | 0.73 | 3.95 | ref. <sup>17</sup> |
| <b>Fe-P-C</b>     | 0.84  | 0.52 | 3.8  | ref. <sup>18</sup> |
| <b>Fe-N/C-800</b> | 0.72  | 0.55 | 3.97 | ref. <sup>19</sup> |
| <b>BP-800</b>     | 0.85  | 0.66 | 3.79 | ref. <sup>20</sup> |
| <b>FeIM/ZIF-8</b> | 0.91  | 0.75 | 3.70 | ref. <sup>21</sup> |

**Table S6.** Comparison of zinc-air battery utilizing H-PZS-Fe-850 with other noble-metal free electrocatalysts reported recently.

| <b>Catalysts</b>                       | <b>Peak power<br/>(mW cm<sup>-2</sup>)</b> | <b>energy density<br/>(mA h g<sup>-1</sup><sub>Zn</sub>)</b> | <b>Ref.</b>        |
|----------------------------------------|--------------------------------------------|--------------------------------------------------------------|--------------------|
| <b>FeP-900</b>                         | 208                                        | 801                                                          | This work          |
| <b>FexN/NC-7</b>                       | 180                                        | 668                                                          | Ref. <sup>22</sup> |
| <b>FeS<sub>2</sub>-CoS<sub>2</sub></b> | 257                                        | 814                                                          | Ref. <sup>23</sup> |
| <b>2D Fe-N-C</b>                       | 320                                        | 798                                                          | Ref. <sup>24</sup> |
| <b>FeNi<sub>3</sub>@NC</b>             | 139                                        | 756                                                          | Ref. <sup>25</sup> |
| <b>FeNC-Fe<sub>x</sub>C/Fe</b>         | 149                                        | 663                                                          | Ref. <sup>26</sup> |
| <b>Co@NC</b>                           | 105                                        | 768                                                          | Ref. <sup>27</sup> |
| <b>Fe-N-HPC</b>                        | 165                                        | 735                                                          | Ref. <sup>28</sup> |

## Section 9. Supporting References

1. Z. Zhang, J. Sun, M. Dou, J. Ji, F. Wang, *ACS Appl. Mater. Interfaces*. 2017, 9, 16236-16242.
2. Z. Xiang, Y. Xue, D. Cao, L. Huang, J.F.Chen, L. Dai, *Angew. Chem. Int. Ed.*, 2014, 53, 2433-2437.
3. S.Ren,J.Wang, X. Xia, *Mater. Interfaces*. 2016, 8, 25875-25880.
4. J. Hao, S. Zhang, R. Liu, J. Ning,G. Zhang, L. Zhi, *Adv. Mater.*, 2015, 27, 3190-3195.
5. K. Hu, Z. Xiao, Y.Cheng, D.Yan, R.Chen, J. Huo, S. Wang, *Electrochim. Acta*. 2017, 254,

280-286.

6. K. P. Singh, E. J. Bae, J. Yu, *J. Am. Chem. Soc.*, 2015, 137, 3165-3168.
7. Y. Wang, Y. Pan, L. Zhu, H. Yu, B. Duan, R. Wang, Z. Zhang, S. Qiu, *Carbon N. Y.*, 2019, 146, 671-679.
8. H. Jin, H. Zhou, W. Li, Z. Wang, J. Yang, Y. Xiong, D. He, L. Chen, S. Mu. *J. Mater. Chem. A.*, 2018, 6, 20093-20099
9. H. Zhong, Y. Luo, S. He, P. Tang, D. Li, N. Alonso-Vante and Y. Feng, *ACS Appl. Mater. Interfaces*, 2017, 9, 2541–2549.
10. R. Jiang and D. Chu, *J. Power Sources*, 2014, **245**, 352–361.
11. X. Liu, X. Zhai, W. Sheng, J. Tu, Z. Zhao, Y. Shi, C. Xu, G. Ge, X. Jia, *J. Mater. Chem. A*, 2021, 9, 10110-10119.
12. J. Xi, Y. Xia, Y. Xu, J. Xiao and S. Wang, *Chem. Commun.*, 2015, 51, 10479–10482.
13. Q. Wang, Y. Lei, Z. Chen, N. Wu, Y. Wang, B. Wang, Y. Wang, *J. Mater. Chem. A*, 2018, 6, 516- 526.
14. H. Shen, E. Gracia-Espino, J. Ma, K. Zang, J. Luo, L. Wang, S. Gao, X. Mamat, G. Hu, T. Wagberg, S. Guo, *Angew. Chem. Int. Ed.*, 2017, 56, 13800-13804.
15. K. P. Singh, E. J. Bae and J.S. Yu, *J. Am. Chem. Soc.*, 2015, **137**, 3165–3168.
16. J. Dou, M. Qi, H. Wang, W. Shi, X. Luan, W. Guo, L. Xiao, C. Zhao, D. Cheng, T. Jiang, W. Zhang, W. Bian, B. Zhou, *Micropor. Mesopor. Mater.*, 2021, 320, 111101.
17. M. Zhang, J. Ming, W. Zhang, J. Xie, P. Lin, X. Song, X. Chen, X. Wang, B. Zhou, *ACS Omega*, 2020,5, 7225-7234.
18. K. P. Singh, E. J. Bae and J.S. Yu, *J. Am. Chem. Soc.*, 2015, 137, 3165–3168.
19. L. Lin, Q. Zhu and A.-W. Xu, *J. Am. Chem. Soc.*, 2014, **136**, 11027–11033.
20. K. P. Singh, E. J. Bae and J.S. Yu, *J. Am. Chem. Soc.*, 2015, 137, 3165–3168.
21. J. Dou, H. Luo, C. Zhang, J. Lu, X. Luan, W. Guo, T. Zhang, W. Bian, J. Bai, X. Zhang and B. Zhou, *New Journal of Chemistry*, 2021, **45**, 21020-21030.
22. D. Zhao, J.L. Shui, C. Chen, X. Chen, B. M. Repragle, D. Wang and D.-J. Liu, *Chem. Sci.*, 2012, **3**, 3200–3205.
23. X. Hu, Y. Min, L.-L. Ma, J.-Y. Lu, H.-C. Li, W.-J. Liu, J.-J. Chen, H.-Q. Yu, *Appl. Catal. B*,

2020, 268,118405.

24. X. Shi, B. He, L. Zhao, Y. Gong, R. Wang, H. Wang, *J. Power Sources*, 2021, 482, 228955.
25. R. Yuan, W. Bi, T. Zhou, N. Zhang, C.a. Zhong, W. Chu, W. Yan, Q. Xu, C. Wu, Y. Xie, *Mater. Lett.*, 2019, 2, 35-41.
26. D. Chen, J. Zhu, X. Mu, R. Cheng, W. Li, S. Liu, Z. Pu, C. Lin, S. Mu, *Appl. Catal. B*, 2020, 268, 118729.
27. Y. Qiao, P. Yuan, Y. Hu, J. Zhang, S. Mu, J. Zhou, H. Li, H. Xia, J. He, Q. Xu, *Adv. Mater.*, 2018, 30, 1804504.
28. S.S. Shinde, C.H. Lee, J.-Y. Jung, N.K. Wagh, S.-H. Kim, D.-H. Kim, C. Lin, S.U. Lee, J.-H. Lee, *Energy Environ. Sci.* 2019, 12, 727-738.
29. D. Wang, H. Xu, P. Yang, L. Xiao, L. Du, X. Lu, R. Li, J. Zhang, M. An, *J. Mater. Chem.A*, 2021, 9, 9761-9770.
